# Supplementary material for: Non-symmetric liquid crystal trimers. The first example of a triply-intercalated alternating smectic C phaseElectronic supplementary information (ESI) available: characterization and thermal analysis of the trimers and their intermediates. See http://www.rsc.org/suppdata/jm/b4/b404319g/
Source: Royal Society of Chemistry journal article supplement (doi:10.1039/b404319g), 2004-01-01
Supplement: b404319g.doc [file b404319g.doc]

# Supplementary data

Non-symmetric liquid crystal trimers. The first example of a triply-intercalated alternating smectic C phase.

Corrie T. Imrie**a,* Peter A. Henderson*a* and John M. Seddon*b*

*a Department of Chemistry,University of Aberdeen, Meston Walk, Aberdeen, UK. Fax: 44 1224 272921; Tel: 44 1224 272943; E-mail: c.t.imrie@abdn.ac.uk*

*b Imperial College of Science, Technology and Medicine, Exhibition Road, London, UK. Fax: 44 207 594 5807; Tel: 44 207 589 5111; E-mail: j.seddon@imperial.ac.uk*

# Characterization and thermal analysis

The trimers and their intermediates were characterized using a combination of 1H NMR spectroscopy using a Bruker AC-F 250MHz spectrometer, FTIR spectroscopy using an ATI Mattson Genesis Series FTIR spectrometer, and elemental analysis carried out by Butterworth Laboratories. The thermal behaviour of the materials was investigated by differential scanning calorimetry (DSC) using a Mettler Toledo DSC 820 differential scanning calorimeter equipped with a TS0801RO sample robot and calibrated using indium and zinc standards. The heating profile in all cases was heat, cool and reheat at 10° min-1 with a 3 minute isotherm between heating and cooling. All samples were heated from 0°C to 20-40 ° above their clearing temperatures. Thermal data were normally extracted from the second heating trace. Phase characterization was performed using polarizing light microscopy using an Olympus BH2 polarizing light microscope equipped with a Linkam TMS 92 hot stage.

The IR spectra (KBr disc,  cm-1) for the trimers are were consistent with the proposed structures. Specifically, the bands associated with the stretch and bend deformations of the N-H bond in the amines (**2**) (R= OCH3, 3463, 3375, 1643 and R = CN, 3466, 3365, 1633) and that associated with the carbonyl band in the aldehydes (**3**) (R = OCH3, 1701 and R = CN, 1687) are absent in the spectra of the products. A new medium-weak strength band associated with the imine stretch is seen at approximately 1600 cm-1. In addition, elemental analysis data are consistent with the proposed structure.

# MeO6E.11OMe

4-[(4-{11-[4-(4-Methoxy-phenylazo)-phenoxy]-undecyloxy}-benzylidene)-amino]-benzoic acid 6-[4-(4-methoxy-phenylazo)-phenoxy]-hexyl ester.

1H NMR (CDCl3)  (ppm): 8.3 (s, 1H, CH=N), 8.1-8.0 (d, 2H Ar-H), 7.9-7.8 (m, 10H, Ar-H) 7.2-7.1 (d, 2H, Ar-H), 7.0-6.9 (m, 8H, Ar-H), 6.6 (d, 2H, Ar-H), 4.4-4.2 (m, 6H, OCH2CH2), 4.1-4.0 (t, 2H, CH2CH2OCO), 3.9 (s, 6H, OCH3), 2.4-2.3 (qn, 2H, CH2CH2CH2OCO), 1.9-1.7 (m, 6H, CH2), 1.7-1.4 (m, 18H, CH2).

# MeO6E.11CN

4-[(4-{11-[4-(4-Cyano-phenylazo)-phenoxy]-undecyloxy}-benzylidene)-amino]-benzoic acid 6-[4-(4-methoxy-phenylazo)-phenoxy]-hexyl ester.

1H NMR (CDCl3)  (ppm): 8.3 (s, 1H, CH=N), 8.1-7.7 (m, 14H Ar-H), 7.2-7.1 (d, 2H, Ar-H), 7.1-6.9 (m, 8H, Ar-H), 4.4-4.2 (m, 6H, OCH2CH2), 4.1-4.0 (t, 2H, CH2CH2OCO), 3.9 (s, 3H, OCH3), 2.4-2.3 (qn, 2H, CH2CH2CH2OCO), 2.0-1.8 (m, 6H, CH2), 1.7-1.5 (m, 18H, CH2).

# CN6E.11OMe

4-[(4-{11-[4-(4-Methoxy-phenylazo)-phenoxy]-undecyloxy}-benzylidene)-amino]-benzoic acid 6-[4-(4-cyano-phenylazo)-phenoxy]-hexyl ester.

1H NMR (CDCl3)  (ppm): 8.3 (s, 1H, CH=N), 8.1-8.0 (d, 2H Ar-H), 8.0-7.7 (m, 12H, Ar-H) 7.2-7.1 (d, 2H, Ar-H), 7.1-6.9 (m, 8H, Ar-H), 4.4-4.2 (m, 6H, OCH2CH2), 4.1-4.0 (t, 2H, CH2CH2OCO), 3.9 (s, 3H, OCH3), 2.4-2.3 (qn, 2H, CH2CH2CH2OCO), 2.0-1.8 (m, 6H, CH2), 1.7-1.5 (m, 18H, CH2).

# CN6E.11CN

4-[(4-{11-[4-(4-Cyano-phenylazo)-phenoxy]-undecyloxy}-benzylidene)-amino]-benzoic acid 6-[4-(4-cyano-phenylazo)-phenoxy]-hexyl ester.

1H NMR (CDCl3)  (ppm): 8.3 (s, 1H, CH=N), 8.1-8.0 (d, 2H Ar-H), 8.0-7.7 (m, 14H, Ar-H) 7.2-7.1 (d, 2H, Ar-H), 7.1-6.9 (m, 6H, Ar-H), 4.4-4.2 (m, 6H, OCH2CH2), 4.1-4.0 (t, 2H, CH2CH2OCO), 2.4-2.3 (qn, 2H, CH2CH2CH2OCO), 2.0-1.7 (m, 6H, CH2), 1.7-1.5 (m, 18H, CH2).
